# Supplementary material
Source: Springer Nature journal article supplement (https://mijn.bsl.nl/resource/supplementary/13047_2009_120_MOESM3_ESM.pdf/7110134)

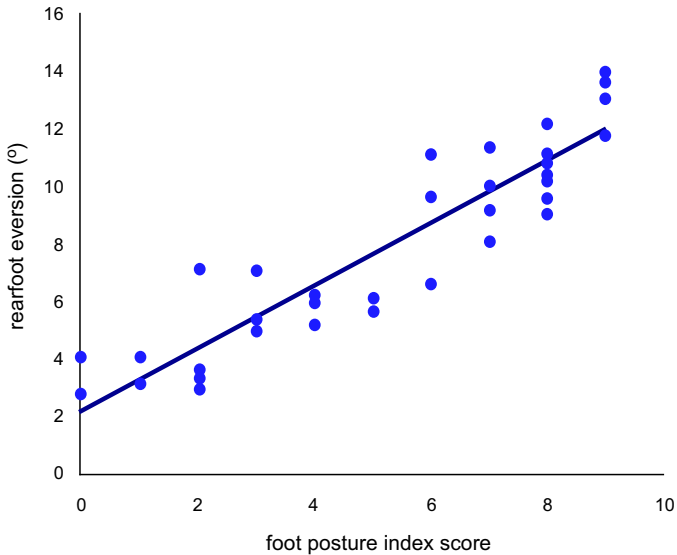

Supplement: MOESM3 [file 7110134]
